# Supplementary material for: Low repeatability of aversive learning in zebrafish ( Danio rerio )
Source: Oxford University Press journal article supplement (doi:10.1242/jeb.240846), 2021-04-30
Supplement: jeb240846supp.pdf [file jeb240846supp.pdf]

**Table S1**

**Repeatability values for aversive learning conditions with bootstrapped 95% confidence intervals.** Results are displayed by the condition, the male and female split, and then a contrast analysis of sex differences. Estimates with CIs that do not overlap zero are presented in bold.

| <i>Conditions</i>        | <i>Repeatability (R)</i> | <i>95% Confidence Interval</i> | <i>Sample Size (n)</i> |
|--------------------------|--------------------------|--------------------------------|------------------------|
| <i>Aversive Learning</i> |                          |                                |                        |
| <i>Across</i>            | <b>0.047</b>             | <b>0.007 - 0.091</b>           | <b>99</b>              |
| <i>Across Male</i>       | <b>0.069</b>             | <b>0.014 - 0.154</b>           | <b>63</b>              |
| <i>Across Female</i>     | 0                        | 0 - 0.055                      | 36                     |
| <i>Contrast Analysis</i> | 0.048                    | -0.012 - 0.114                 |                        |
| <i>Green/Blue</i>        | 0.028                    | 0 - 0.137                      | 99                     |
| <i>Green/Blue Male</i>   | 0.039                    | 0 - 0.222                      | 62                     |
| <i>Green/Blue Female</i> | 0.016                    | 0 - 0.203                      | 37                     |
| <i>Contrast Analysis</i> | 0.002                    | -0.179 - 0.176                 |                        |
| <i>Blue/Green</i>        | <b>0.150</b>             | <b>0.023 - 0.308</b>           | <b>100</b>             |
| <i>Blue/Green Male</i>   | <b>0.232</b>             | <b>0.050 - 0.374</b>           | <b>62</b>              |
| <i>Blue/Green Female</i> | 0.022                    | 0 - 0.195                      | 38                     |
| <i>Contrast Analysis</i> | 0.173                    | -0.101 - 0.375                 |                        |

**Table S2**

**Colour preference repeatability values for grey, green, red and orange with bootstrapped 95% confidence intervals.** Results are displayed by the colour, the male and female split, and then a contrast analysis of sex differences. Estimates with CIs that do not overlap zero are presented in bold.

| <i>Colour</i>               | <i>Repeatability (R)</i> | <i>95% Confidence Interval</i> | <i>Sample Size (n)</i> |
|-----------------------------|--------------------------|--------------------------------|------------------------|
| <i>Colour Preference</i>    |                          |                                |                        |
| <b><i>Grey</i></b>          | <b>0.455</b>             | <b>0.276 - 0.607</b>           | <b>97</b>              |
| <b><i>Grey Male</i></b>     | <b>0.499</b>             | <b>0.309 - 0.657</b>           | <b>61</b>              |
| <b><i>Grey Female</i></b>   | <b>0.391</b>             | <b>0.056 - 0.635</b>           | <b>36</b>              |
| <i>Contrast Analysis</i>    | 0.159                    | -0.124 – 0.506                 |                        |
|                             |                          |                                |                        |
| <b><i>Green</i></b>         | <b>0.454</b>             | <b>0.278 - 0.604</b>           | <b>97</b>              |
| <b><i>Green Male</i></b>    | <b>0.434</b>             | <b>0.215 - 0.614</b>           | <b>61</b>              |
| <b><i>Green Female</i></b>  | <b>0.490</b>             | <b>0.203 - 0.702</b>           | <b>36</b>              |
| <i>Contrast Analysis</i>    | 0.105                    | -0.204 - 0.524                 |                        |
|                             |                          |                                |                        |
| <b><i>Red</i></b>           | <b>0.438</b>             | <b>0.250 - 0.584</b>           | <b>98</b>              |
| <b><i>Red Male</i></b>      | <b>0.492</b>             | <b>0.288 - 0.656</b>           | <b>62</b>              |
| <b><i>Red Female</i></b>    | <b>0.331</b>             | <b>0.009 - 0.586</b>           | <b>36</b>              |
| <i>Contrast Analysis</i>    | -0.04                    | -0.367 - 0.334                 |                        |
|                             |                          |                                |                        |
| <b><i>Orange</i></b>        | <b>0.463</b>             | <b>0.283 - 0.605</b>           | <b>98</b>              |
| <b><i>Orange Male</i></b>   | <b>0.519</b>             | <b>0.280 - 0.681</b>           | <b>63</b>              |
| <b><i>Orange Female</i></b> | <b>0.411</b>             | <b>0.083 - 0.649</b>           | <b>35</b>              |
| <i>Contrast Analysis</i>    | 0.083                    | -0.191 – 0.461                 |                        |

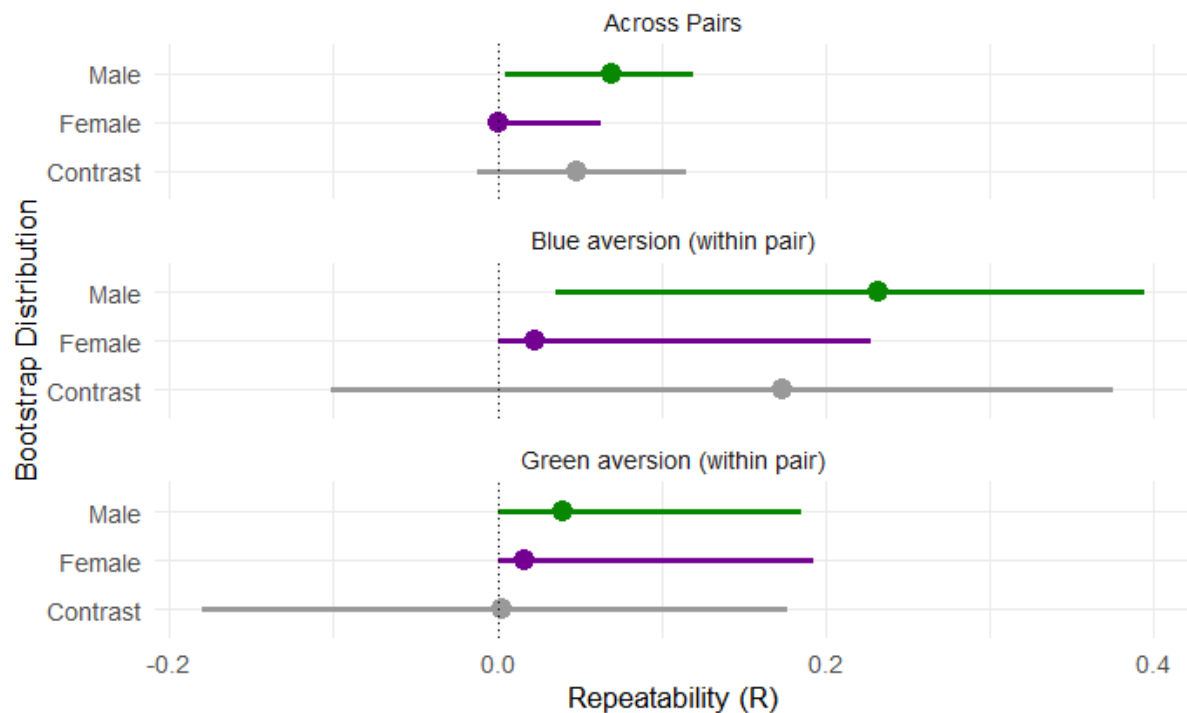

**Figure S1**

**Male and female zebrafish contrast analysis of repeatability estimates across conditions, in the 'Blue/Green' condition and in the 'Green/Blue' condition.** In all conditions, male and females differ in the repeatability bootstrap distribution, however, the contrast analysis indicates by way of the distributions overlapping zero that males and females do not significantly differ in repeatability.
